# Supplementary material
Source: MDPI journal article supplement (https://www.mdpi.com/2073-4441/13/11/1548)
Supplement: s1 [file s1]

## Supplementary Tables

**Table S1.** Detail of scores for the changes in precipitation and temperature indices of selected GCMs in each corner before intermediate selection step (Step 2)

| RCP 4.5            |                             |                   |                  |                    |                   |                       |                |             |             |                |
|--------------------|-----------------------------|-------------------|------------------|--------------------|-------------------|-----------------------|----------------|-------------|-------------|----------------|
| Condition          | Model                       | $\Delta r95p(\%)$ | $\Delta cdd(\%)$ | $\Delta wdsdi(\%)$ | $\Delta csdi(\%)$ | $\Delta T(^{\circ}C)$ | $\Delta P(\%)$ | Tindex rank | Pindex rank | Combined Score |
| Cold,dry<br>p10_10 | inmcm4_rcp45_r1i1p1         | 6.6               | 8.8              | 136.5              | -21.3             | 0.7                   | -0.4           | 5           | 2           | 3.5            |
|                    | FGOALS-g2_rcp45_r1i1p1      | -8.1              | -0.6             | 385.7              | -89.9             | 1.4                   | -3.4           | 1           | 1           | 1              |
|                    | bcc-csm1-1-m_rcp45_r1i1p1   | 6.4               | 21.1             | 226.5              | -78.4             | 1.4                   | 1.9            | 2           | 4           | 3              |
|                    | HadGEM2-CC_rcp45_r1i1p1     | 0.8               | 44.7             | 564.6              | -74.5             | 1.6                   | -2.5           | 3           | 5           | 4              |
|                    | MPI-ESM-MR_rcp45_r2i1p1     | -0.9              | 12.4             | 207.5              | -69.2             | 1.5                   | -0.4           | 4           | 3           | 3.5            |
| Cold,wet<br>p10_90 | MRI-CGCM3_rcp45_r1i1p1      | 53.0              | -11.9            | 120.4              | -90.0             | 1.2                   | 13.9           | 1           | 5           | 3              |
|                    | CSIRO-Mk3-6-0_rcp45_r3i1p1  | 34.6              | -0.6             | 389.5              | -55.9             | 1.2                   | 14.8           | 3           | 3           | 3              |
|                    | CSIRO-Mk3-6-0_rcp45_r8i1p1  | 16.7              | 3.8              | 223.0              | -54.9             | 1.4                   | 11.5           | 4           | 1           | 2.5            |
|                    | CESM1-BGC_rcp45_r1i1p1      | 30.5              | -8.8             | 218.1              | -73.8             | 1.4                   | 10.3           | 2           | 2           | 2              |
|                    | GFDL-ESM2G_rcp45_r1i1p1     | 38.9              | 5.3              | 377.5              | -78.1             | 1.4                   | 7.2            | 5           | 4           | 4.5            |
| Warm,wet<br>p90_90 | CanESM2_rcp45_r3i1p1        | 50.9              | 2.2              | 211.6              | -87.0             | 2.3                   | 12.7           | 3           | 4           | 3.5            |
|                    | CanESM2_rcp45_r2i1p1        | 44.5              | 5.8              | 302.8              | -78.8             | 2.3                   | 13.3           | 5           | 3           | 4              |
|                    | CanESM2_rcp45_r1i1p1        | 51.1              | 7.2              | 180.0              | -79.7             | 2.1                   | 16.0           | 2           | 5           | 3.5            |
|                    | CanESM2_rcp45_r5i1p1        | 30.7              | -8.4             | 149.8              | -88.8             | 2.2                   | 9.4            | 1           | 2           | 1.5            |
|                    | IPSL-CM5A-LR_rcp45_r3i1p1   | 19.7              | -0.6             | 279.8              | -78.1             | 2.0                   | 15.0           | 4           | 1           | 2.5            |
| Warm,dry<br>p90_10 | CSIRO-Mk3-6-0_rcp45_r9i1p1  | -4.7              | 28.5             | 683.2              | -84.7             | 2.0                   | -0.8           | 5           | 5           | 5              |
|                    | GFDL-CM3_rcp45_r1i1p1       | 0.3               | 4.5              | 646.5              | -85.4             | 3.2                   | -3.8           | 4           | 2           | 3              |
|                    | MPI-ESM-LR_rcp45_r2i1p1     | -7.6              | 9.5              | 291.7              | -81.9             | 2.0                   | -7.7           | 2           | 3           | 2.5            |
|                    | MPI-ESM-LR_rcp45_r3i1p1     | 10.3              | 18.0             | 331.5              | -76.2             | 2.1                   | 0.8            | 3           | 4           | 3.5            |
|                    | MIROC-ESM_rcp45_r1i1p1      | 8.0               | -4.0             | 233.1              | -98.2             | 1.9                   | -0.6           | 1           | 1           | 1              |
| RCP 8.5            |                             |                   |                  |                    |                   |                       |                |             |             |                |
| Cold,dry<br>p10_10 | inmcm4_rcp85_r1i1p1         | 15.6              | 3.4              | 168.1              | -37.5             | 1.0                   | 3.4            | 5           | 1           | 3              |
|                    | GFDL-ESM2G_rcp85_r1i1p1     | 25.8              | 7.2              | 362.5              | -61.9             | 1.6                   | 2.7            | 3           | 2           | 2.5            |
|                    | HadGEM2-ES_rcp85_r4i1p1     | 10.0              | 30.0             | 383.8              | -65.0             | 1.6                   | -1.2           | 2           | 4           | 3              |
|                    | FGOALS-g2_rcp85_r1i1p1      | 6.3               | 9.2              | 281.8              | -92.7             | 1.6                   | 2.6            | 1           | 3           | 2              |
|                    | HadGEM2-ES_rcp85_r1i1p1     | 7.4               | 42.3             | 352.8              | -56.6             | 1.7                   | -3.4           | 4           | 5           | 4.5            |
| Cold,wet<br>p10_90 | CSIRO-Mk3-6-0_rcp85_r8i1p1  | 21.6              | -9.8             | 218.2              | -57.5             | 1.3                   | 14.4           | 3           | 2           | 2.5            |
|                    | CSIRO-Mk3-6-0_rcp85_r3i1p1  | 30.2              | -11.3            | 349.9              | -55.4             | 1.4                   | 16.1           | 5           | 3           | 4              |
|                    | GFDL-ESM2M_rcp85_r1i1p1     | 44.1              | -0.3             | 235.0              | -56.7             | 1.4                   | 12.8           | 4           | 4           | 4              |
|                    | IPSL-CM5B-LR_rcp85_r1i1p1   | 12.8              | -11.7            | 152.2              | -69.4             | 1.2                   | 10.6           | 2           | 1           | 1.5            |
|                    | bcc-csm1-1_rcp85_r1i1p1     | 50.9              | 3.7              | 347.2              | -82.3             | 1.6                   | 8.8            | 1           | 5           | 3              |
| Warm,wet<br>p90_90 | CanESM2_rcp85_r2i1p1        | 48.3              | 4.1              | 325.0              | -90.1             | 2.4                   | 15.4           | 4           | 2           | 3              |
|                    | CanESM2_rcp85_r3i1p1        | 49.3              | 8.3              | 285.7              | -74.2             | 2.7                   | 13.2           | 3           | 4           | 3.5            |
|                    | IPSL-CM5A-MR_rcp85_r1i1p1   | 43.7              | 1.1              | 347.0              | -90.8             | 2.5                   | 11.0           | 5           | 1           | 3              |
|                    | CanESM2_rcp85_r5i1p1        | 48.8              | -15.2            | 169.8              | -91.2             | 2.3                   | 15.9           | 1           | 3           | 2              |
|                    | CanESM2_rcp85_r1i1p1        | 68.6              | -2.8             | 208.9              | -74.7             | 2.4                   | 22.5           | 2           | 5           | 3.5            |
| Warm,dry<br>p90_10 | MPI-ESM-LR_rcp85_r3i1p1     | 16.6              | 12.6             | 414.3              | -92.6             | 2.6                   | -0.5           | 3           | 3           | 3              |
|                    | CMCC-CMS_rcp85_r1i1p1       | 5.1               | 9.7              | 318.0              | -89.7             | 2.6                   | -6.9           | 1           | 1           | 1              |
|                    | GFDL-CM3_rcp85_r1i1p1       | 12.2              | 14.9             | 603.8              | -76.7             | 3.0                   | -2.1           | 4           | 5           | 4.5            |
|                    | MIROC-ESM-CHEM_rcp85_r1i1p1 | 10.0              | 12.8             | 729.1              | -94.8             | 2.6                   | -0.3           | 5           | 4           | 4.5            |
|                    | MPI-ESM-LR_rcp85_r2i1p1     | -11.2             | 10.4             | 369.4              | -85.2             | 2.4                   | -11.1          | 2           | 2           | 2              |

**Table S2.** Selected GCMs in intermediate selection step (Step 3) using Taylor score

| RCP 4.5                |                                    |               |              |              |
|------------------------|------------------------------------|---------------|--------------|--------------|
| Condition              | GCMs                               | Taylor Score  |              |              |
|                        |                                    | Precipitation | Temperature  | Combined     |
| Cold – dry<br>(p10_10) | inmcm4_rcp45_r1i1p1                | 0.707         | 0.835        | 0.771        |
|                        | <b>HadGEM2-CC_rcp45_r1i1p1</b>     | <b>0.792</b>  | <b>0.928</b> | <b>0.86</b>  |
|                        | MPI-ESM-MR_rcp45_r2i1p1            | 0.658         | 0.901        | 0.779        |
| Cold – wet<br>(p10_90) | MRI-CGCM3_rcp45_r1i1p1             | 0.568         | 0.891        | 0.729        |
|                        | CSIRO-Mk3-6-0_rcp45_r3i1p1         | 0.49          | 0.891        | 0.69         |
|                        | <b>GFDL-ESM2G_rcp45_r1i1p1</b>     | <b>0.663</b>  | <b>0.904</b> | <b>0.784</b> |
| Warm – wet<br>(p90_90) | <b>CanESM2_rcp45_r3i1p1</b>        | <b>0.578</b>  | <b>0.829</b> | <b>0.703</b> |
|                        | CanESM2_rcp45_r2i1p1               | 0.529         | 0.832        | 0.68         |
|                        | CanESM2_rcp45_r1i1p1               | 0.571         | 0.818        | 0.694        |
| Warm – dry<br>(p90_10) | CSIRO-Mk3-6-0_rcp45_r9i1p1         | 0.473         | 0.881        | 0.677        |
|                        | <b>MPI-ESM-LR_rcp45_r3i1p1</b>     | <b>0.637</b>  | <b>0.886</b> | <b>0.761</b> |
| RCP 8.5                |                                    |               |              |              |
| Condition              | GCMs                               | Taylor Skill  |              |              |
|                        |                                    | Precipitation | Temperature  | Combined     |
| Cold – dry<br>(p10_10) | inmcm4_rcp85_r1i1p1                | 0.707         | 0.835        | 0.771        |
|                        | HadGEM2-ES_rcp85_r4i1p1            | 0.789         | 0.952        | 0.871        |
|                        | <b>HadGEM2-ES_rcp85_r1i1p1</b>     | <b>0.802</b>  | <b>0.947</b> | <b>0.874</b> |
| Cold – wet<br>(p10_90) | CSIRO-Mk3-6-0_rcp85_r3i1p1         | 0.49          | 0.891        | 0.69         |
|                        | <b>GFDL-ESM2M_rcp85_r1i1p1</b>     | <b>0.66</b>   | <b>0.891</b> | <b>0.775</b> |
| Warm – wet<br>(p90_90) | <b>CanESM2_rcp85_r3i1p1</b>        | <b>0.578</b>  | <b>0.829</b> | <b>0.703</b> |
|                        | CanESM2_rcp85_r1i1p1               | 0.571         | 0.818        | 0.694        |
| Warm – dry<br>(p90_10) | GFDL-CM3_rcp85_r1i1p1              | 0.47          | 0.838        | 0.654        |
|                        | <b>MIROC-ESM-CHEM_rcp85_r1i1p1</b> | <b>0.493</b>  | <b>0.877</b> | <b>0.685</b> |

Notes: Bold GCMs are selected from step 3.

**Table S3.** The long-term monthly flow of three-time windows projected by four GCMs representing four climatic conditions of RCP 4.5 emission scenario

| Month                             | Jan                     | Feb | Mar | Apr | May | Jun | Jul | Aug | Sep | Oct | Nov | Dec | Year |
|-----------------------------------|-------------------------|-----|-----|-----|-----|-----|-----|-----|-----|-----|-----|-----|------|
| Baseline Flow (m <sup>3</sup> /s) | 73                      | 70  | 83  | 113 | 173 | 355 | 582 | 600 | 436 | 193 | 101 | 81  | 240  |
| Cold-wet (p <sub>10_90</sub> )    | GFDL-ESM2G_rcp45_r1i1p1 |     |     |     |     |     |     |     |     |     |     |     |      |
| IF                                | 81                      | 79  | 114 | 138 | 178 | 375 | 688 | 793 | 497 | 219 | 123 | 90  | 283  |
| MF                                | 77                      | 75  | 106 | 133 | 163 | 423 | 682 | 847 | 490 | 214 | 119 | 98  | 287  |
| LF                                | 87                      | 80  | 104 | 132 | 170 | 414 | 711 | 879 | 541 | 211 | 121 | 93  | 297  |
| Warm-wet (p <sub>90_90</sub> )    | CanESM2_rcp45_r3i1p1    |     |     |     |     |     |     |     |     |     |     |     |      |
| IF                                | 87                      | 85  | 129 | 139 | 178 | 428 | 640 | 888 | 645 | 257 | 121 | 99  | 309  |
| MF                                | 85                      | 87  | 124 | 138 | 162 | 467 | 699 | 873 | 639 | 237 | 113 | 92  | 311  |
| LF                                | 84                      | 83  | 139 | 126 | 164 | 432 | 646 | 834 | 664 | 272 | 114 | 92  | 306  |
| Cold-dry (p <sub>10_10</sub> )    | HadGEM2-CC_rcp45_r1i1p1 |     |     |     |     |     |     |     |     |     |     |     |      |
| IF                                | 79                      | 74  | 95  | 110 | 168 | 334 | 659 | 665 | 559 | 208 | 108 | 84  | 263  |
| MF                                | 88                      | 82  | 102 | 134 | 188 | 295 | 751 | 777 | 656 | 256 | 120 | 91  | 297  |
| LF                                | 83                      | 82  | 102 | 140 | 204 | 346 | 836 | 798 | 726 | 225 | 114 | 91  | 314  |
| Warm-dry (p <sub>90_10</sub> )    | MPI-ESM-LR_rcp45_r3i1p1 |     |     |     |     |     |     |     |     |     |     |     |      |
| IF                                | 86                      | 83  | 111 | 123 | 244 | 536 | 710 | 730 | 527 | 218 | 127 | 96  | 301  |
| MF                                | 82                      | 84  | 110 | 124 | 171 | 422 | 724 | 764 | 543 | 206 | 122 | 91  | 288  |
| LF                                | 81                      | 88  | 110 | 109 | 191 | 421 | 658 | 717 | 550 | 219 | 118 | 89  | 281  |

**Table S4.** The long-term monthly flow of three-time windows projected by four GCMs representing four climatic conditions of RCP 8.5 emission scenario

| Month                             | Jan                         | Feb | Mar | Apr | May | Jun | Jul | Aug  | Sep | Oct | Nov | Dec | Year |
|-----------------------------------|-----------------------------|-----|-----|-----|-----|-----|-----|------|-----|-----|-----|-----|------|
| Baseline Flow (m <sup>3</sup> /s) | 73                          | 70  | 83  | 113 | 173 | 355 | 582 | 600  | 436 | 193 | 101 | 81  | 240  |
| Cold-wet (p <sub>10_90</sub> )    | GFDL-ESM2M_rcp85_r1i1p1     |     |     |     |     |     |     |      |     |     |     |     |      |
| IF                                | 95                          | 90  | 126 | 138 | 189 | 397 | 691 | 759  | 510 | 217 | 125 | 95  | 287  |
| MF                                | 91                          | 98  | 136 | 125 | 176 | 440 | 887 | 943  | 627 | 235 | 122 | 104 | 334  |
| LF                                | 104                         | 104 | 124 | 147 | 176 | 404 | 964 | 941  | 710 | 278 | 128 | 99  | 350  |
| Warm-wet (p <sub>90_90</sub> )    | CanESM2_rcp85_r3i1p1        |     |     |     |     |     |     |      |     |     |     |     |      |
| IF                                | 97                          | 91  | 140 | 139 | 183 | 503 | 647 | 840  | 589 | 270 | 120 | 102 | 311  |
| MF                                | 92                          | 88  | 137 | 144 | 196 | 461 | 648 | 866  | 626 | 295 | 118 | 94  | 315  |
| LF                                | 100                         | 100 | 154 | 158 | 186 | 471 | 803 | 1067 | 823 | 390 | 137 | 110 | 377  |
| Cold-dry (p <sub>10_10</sub> )    | HadGEM2-ES_rcp85_r1i1p1     |     |     |     |     |     |     |      |     |     |     |     |      |
| IF                                | 88                          | 77  | 106 | 147 | 199 | 449 | 792 | 778  | 525 | 240 | 128 | 104 | 304  |
| MF                                | 80                          | 75  | 109 | 142 | 226 | 586 | 788 | 744  | 544 | 261 | 136 | 101 | 317  |
| LF                                | 88                          | 85  | 131 | 150 | 213 | 538 | 940 | 911  | 694 | 274 | 135 | 111 | 358  |
| Warm-dry (p <sub>90_10</sub> )    | MIROC-ESM-CHEM_rcp85_r1i1p1 |     |     |     |     |     |     |      |     |     |     |     |      |
| IF                                | 81                          | 87  | 105 | 164 | 140 | 213 | 307 | 549  | 599 | 433 | 218 | 108 | 251  |
| MF                                | 90                          | 101 | 118 | 169 | 138 | 194 | 270 | 534  | 658 | 561 | 300 | 125 | 272  |
| LF                                | 102                         | 104 | 110 | 177 | 243 | 339 | 620 | 762  | 769 | 447 | 178 | 102 | 331  |
